# Supplementary material for: Effect of Contact-Based Interventions on Stigma and Discrimination: A Critical Examination of the Evidence
Source: Atypon-hosted journal article supplement (doi:10.1176/appi.ps.201900587), 2020-03-19
Supplement: appi.ps.201900587.ds001.pdf [file appi.ps.201900587.ds001.pdf]

Summary of systematic reviews and meta-analyses of trials on contact-based interventions

| Authors              | Target mental disorders     | Interventions covered                                                                                                  | Research designs                     | Population                                    | Outcomes covered                                                                                                                                 | Main findings on contact-based interventions                                                                                                                                                                                                         |
|----------------------|-----------------------------|------------------------------------------------------------------------------------------------------------------------|--------------------------------------|-----------------------------------------------|--------------------------------------------------------------------------------------------------------------------------------------------------|------------------------------------------------------------------------------------------------------------------------------------------------------------------------------------------------------------------------------------------------------|
| Corrigan et al. (6)  | Mental illness              | <ul style="list-style-type: none"> <li>• Contact</li> <li>• Education</li> <li>• Protest</li> </ul>                    | Randomized and non-randomized trials | All countries, all ages                       | <ul style="list-style-type: none"> <li>• Attitudes</li> <li>• Affect</li> <li>• Behavioral intention</li> </ul>                                  | <ul style="list-style-type: none"> <li>• Attitudes and behavioral intentions improved</li> <li>• Affect not changed</li> <li>• Face-to-face contact better than video</li> </ul>                                                                     |
| Yamaguchi et al. (7) | Mental illness              | <ul style="list-style-type: none"> <li>• Social contact</li> <li>• Education</li> <li>• Famous film</li> </ul>         | Controlled trials                    | All countries, university or college students | <ul style="list-style-type: none"> <li>• Knowledge</li> <li>• Attitudes</li> <li>• Social distance/behavioral intentions</li> </ul>              | <ul style="list-style-type: none"> <li>• Social contact changed attitudes and social distance</li> <li>• Video-based social contact changed attitudes</li> <li>• Limited evidence on long-term effects</li> </ul>                                    |
| Griffiths et al. (8) | Mental illness              | <ul style="list-style-type: none"> <li>• Contact</li> <li>• Education</li> <li>• Cognitive-behavior therapy</li> </ul> | Randomized controlled trials         | All countries, all ages                       | <ul style="list-style-type: none"> <li>• Personal stigma or social distance</li> <li>• Perceived stigma</li> <li>• Self-stigma</li> </ul>        | <ul style="list-style-type: none"> <li>• Interventions with a contact component reduced personal stigma</li> <li>• No effect for contact alone without adjunct</li> </ul>                                                                            |
| Corrigan et al. (9)  | Mental illness              | <ul style="list-style-type: none"> <li>• Contact</li> <li>• Education</li> </ul>                                       | Randomized and non-randomized trials | All countries, all ages                       | <ul style="list-style-type: none"> <li>• Overall stigma</li> <li>• Attitudes</li> </ul>                                                          | <ul style="list-style-type: none"> <li>• Effects on overall stigma did not persist over time</li> <li>• Effects on attitudes did persist</li> </ul>                                                                                                  |
| Mehta et al. (10)    | Functional mental illnesses | All                                                                                                                    | All quantitative study designs       | All countries, all ages                       | <p>Medium and long-term changes in:</p> <ul style="list-style-type: none"> <li>• Knowledge</li> <li>• Attitudes</li> <li>• Behavior</li> </ul>   | <ul style="list-style-type: none"> <li>• Contact effects did not persist in the longer term</li> <li>• Direct contact had a smaller effect than indirect and no-contact interventions</li> <li>• Insufficient data on behavioral outcomes</li> </ul> |
| Xu et al. (11)       | Mental illness              | <ul style="list-style-type: none"> <li>• Contact</li> <li>• Education</li> <li>• Combined</li> </ul>                   | Randomized and non-randomized trials | China and Taiwan, general public              | <ul style="list-style-type: none"> <li>• Stereotypes</li> <li>• Prejudice</li> <li>• Discrimination</li> <li>• Mental health literacy</li> </ul> | <ul style="list-style-type: none"> <li>• No difference on stereotypes between interventions with and without contact</li> <li>• Contact did not add to</li> </ul>                                                                                    |

|                      |                                                                   |                                                                                                                                                                           |                                                                      |                         |                                                                                                                                                                                          |                                                                                                                                                                                                                                                                                                                                                                                                                                              |
|----------------------|-------------------------------------------------------------------|---------------------------------------------------------------------------------------------------------------------------------------------------------------------------|----------------------------------------------------------------------|-------------------------|------------------------------------------------------------------------------------------------------------------------------------------------------------------------------------------|----------------------------------------------------------------------------------------------------------------------------------------------------------------------------------------------------------------------------------------------------------------------------------------------------------------------------------------------------------------------------------------------------------------------------------------------|
|                      |                                                                   |                                                                                                                                                                           |                                                                      |                         |                                                                                                                                                                                          | the effect of education on stereotypes                                                                                                                                                                                                                                                                                                                                                                                                       |
| Morgan et al. (12)   | Severe mental illness: schizophrenia, psychosis, bipolar disorder | <ul style="list-style-type: none"> <li>• Contact</li> <li>• Educational</li> <li>• Mixed</li> <li>• Family psychoeducation</li> <li>• Hallucination simulation</li> </ul> | Randomized controlled trials                                         | All countries, all ages | <ul style="list-style-type: none"> <li>• Personal/public stigma</li> <li>• Social distance, avoidance, behavioral intentions</li> </ul>                                                  | <ul style="list-style-type: none"> <li>• Contact produced small-to-medium reductions in attitudes and social distance</li> <li>• Effectiveness beyond end of intervention not demonstrated</li> <li>• No effect of intervention length</li> <li>• Similar effects of direct, indirect and imaginary contact</li> <li>• Similar effects of single vs multiple forms of contact</li> </ul>                                                     |
| Maunder & White (13) | Mental illness                                                    | <ul style="list-style-type: none"> <li>• Contact</li> </ul>                                                                                                               | Randomized controlled trials, non-randomized and uncontrolled trials | All countries, all ages | <ul style="list-style-type: none"> <li>• Explicit attitudes</li> <li>• Affective bias</li> <li>• Intentions</li> <li>• Implicit bias</li> <li>• Behavior</li> <li>• Prejudice</li> </ul> | <ul style="list-style-type: none"> <li>• Contact changed explicit attitudes, affective bias, behavioral intentions and prejudice, but not implicit bias or behavior</li> <li>• Effects persisted in the short- and medium-term.</li> <li>• Contact-based education and pure contact had similar effects</li> <li>• Effects of contact were similar across mediums</li> <li>• Effects did not vary with number of people contacted</li> </ul> |
